# Supplementary material for: Brief communication &quot;Using the new Philippine radar network to reconstruct the &lt;i&gt;Habagat of August 2012&lt;/i&gt; monsoon event around Metropolitan Manila&quot;
Source: Copernicus journal article supplement (doi:10.5194/nhess-13-653-2013), 2013-03-13
Supplement: Supplementary file 1 [file nhess-13-653-2013-supplement.pdf]

1 Supplemental material to the manuscript

2 **Brief Communication: Using the new Philippine radar network to reconstruct**  
3 **the “Habagat of August 2012” monsoon event around Metropolitan Manila**

4 *by M. Heistermann, I. Crisologo, C. C. Abon, B. A. Racoma, S. Jacobi, N. T.*  
5 *Servando, C. P. C. David, and A. Bronstert*

6

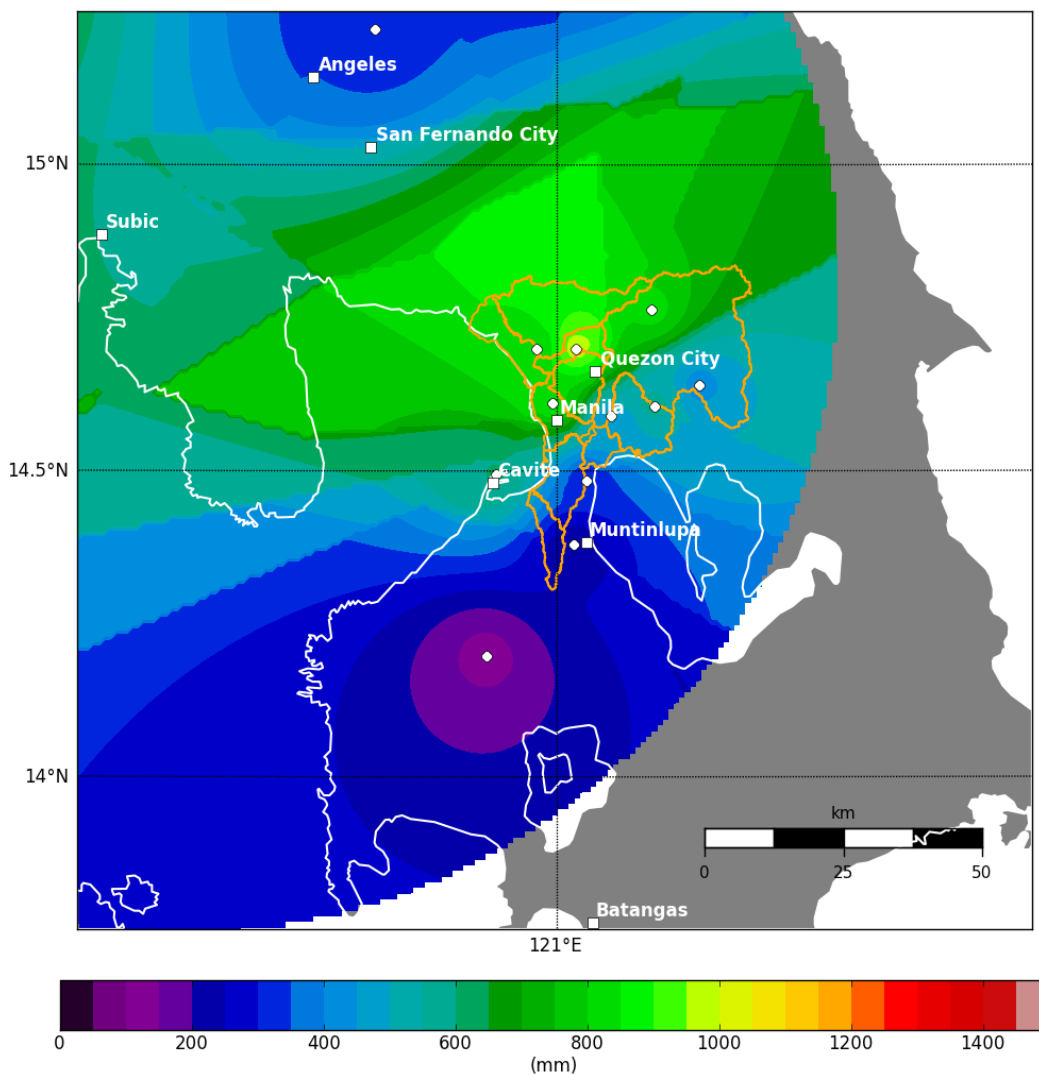

7

8 **Supplemental figure:** Accumulated rainfall as estimated from the interpolation of rain gauge  
9 observations using inverse distance weighting; accumulation period from Aug 6 (00:00 UTC)  
10 to Aug 9 (20:00 UTC). Basins draining to Metropolitan Manila are shown in orange,  
11 coastlines in white. Major cities are shown as white squares, while rain gauges are represented  
12 as white circles.
